# Supplementary material for: Engineering of Three-Finger Fold Toxins Creates Ligands with Original Pharmacological Profiles for Muscarinic and Adrenergic Receptors
Source: PubMed Central journal article supplement (PMC3375269; doi:10.1371/journal.pone.0039166), 2012-06-14
Supplement: pone.0039166.s001.pdf [file pone.0039166.s001.pdf]

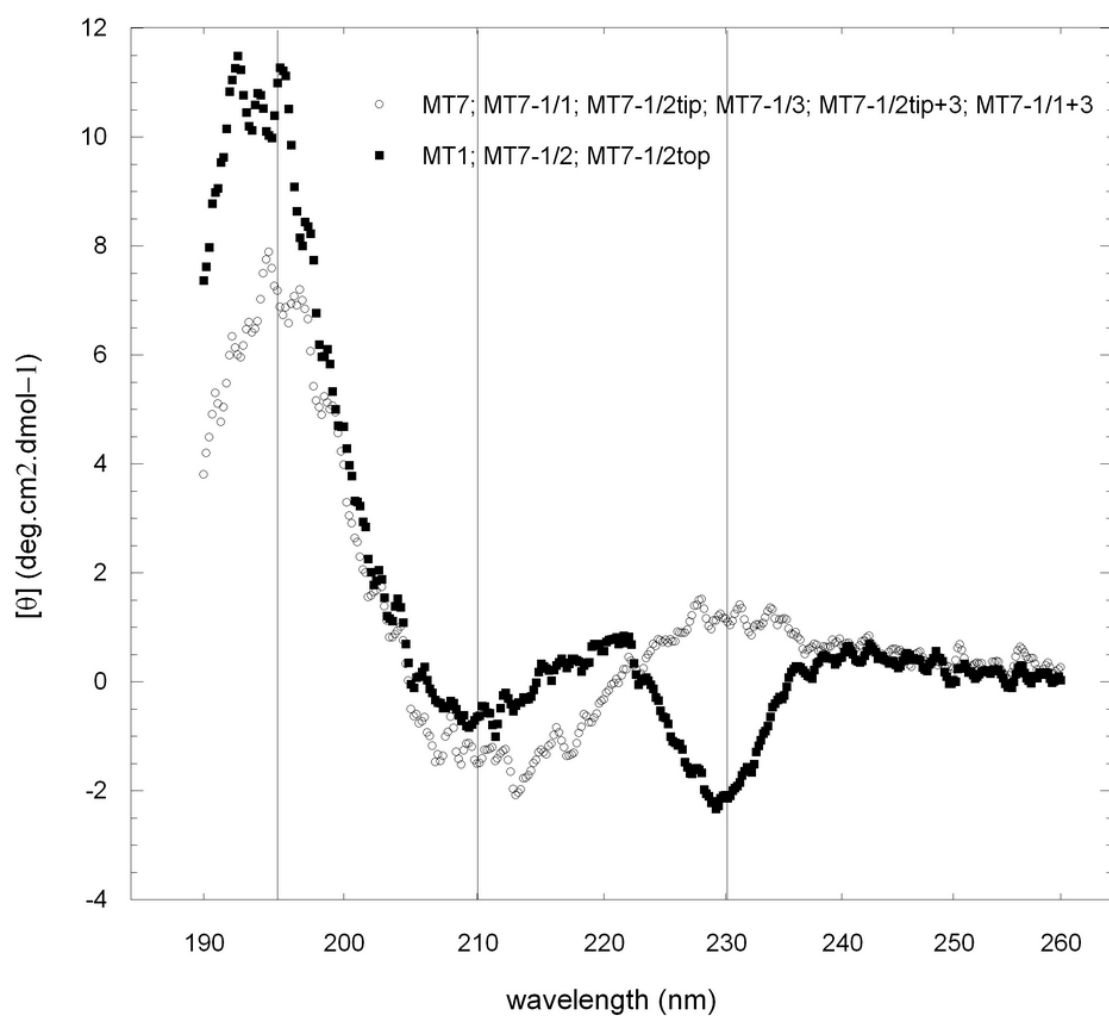

**Figure S1. Overall far-UV CD spectra pattern of the different toxins and chimera.** The CD spectra were monitored in water, at 20 C° with a peptide concentration of 10  $\mu$ M.
