# Supplementary material for: Engineering of Three-Finger Fold Toxins Creates Ligands with Original Pharmacological Profiles for Muscarinic and Adrenergic Receptors
Source: PubMed Central journal article supplement (PMC3375269; doi:10.1371/journal.pone.0039166), 2012-06-14
Supplement: pone.0039166.s003.pdf [file pone.0039166.s003.pdf]

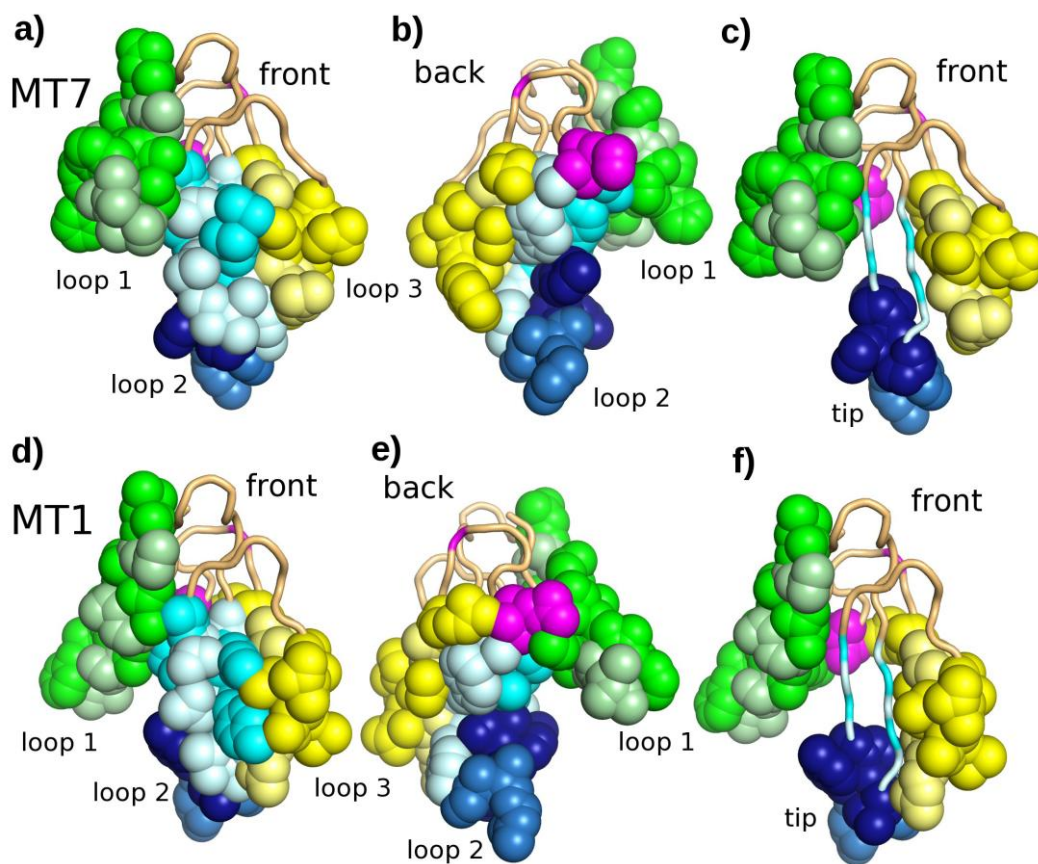

**Figure S3. Space-filling representation of MT7 and MT1.** The residues from loop 1 colored in green (conserved in lighter shade), residues from loop 2 in blue (tip) and cyan (top) with the conserved residues in lighter shades, loop 3 in yellow (conserved in lighter shade) and the C-terminal residue in magenta. **a)** Front view of MT7 showing the interacting residues from the three loops. **b)** Back view of MT7 showing the interacting residues from the three loops and the C-terminal residue. **c)** Front view of MT7 with the residues from loop 2 top removed to show the lack of interactions between the other elements of the toxin assembly apart from the interaction of the C-terminal residue with loop 1. **d)** Front view of MT1 showing that the overall shape of the toxin differs substantially from that of MT7. **e)** Back view of MT1 showing variations in most elements, except the tip that maintains its orientation relative to the rest of the toxin as in MT7. **f)** With the top of loop 2 removed, MT1 shows that its C-terminal residue mediates an interaction between loops 1 and 3 and that the tip of loop 2 is stabilized by the longer loop 3.
